# Supplementary figures and images for: Insights into the Mechanisms of Heat Priming and Thermotolerance in Tobacco Pollen
Source: MDPI journal article supplement (doi:10.3390/ijms22168535), 2021-08-08

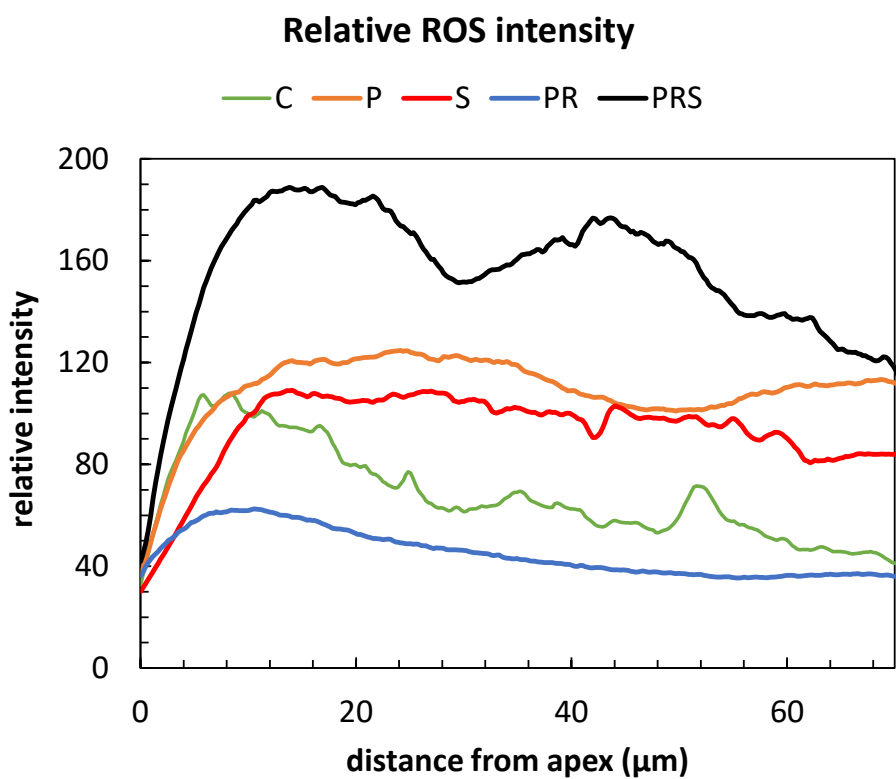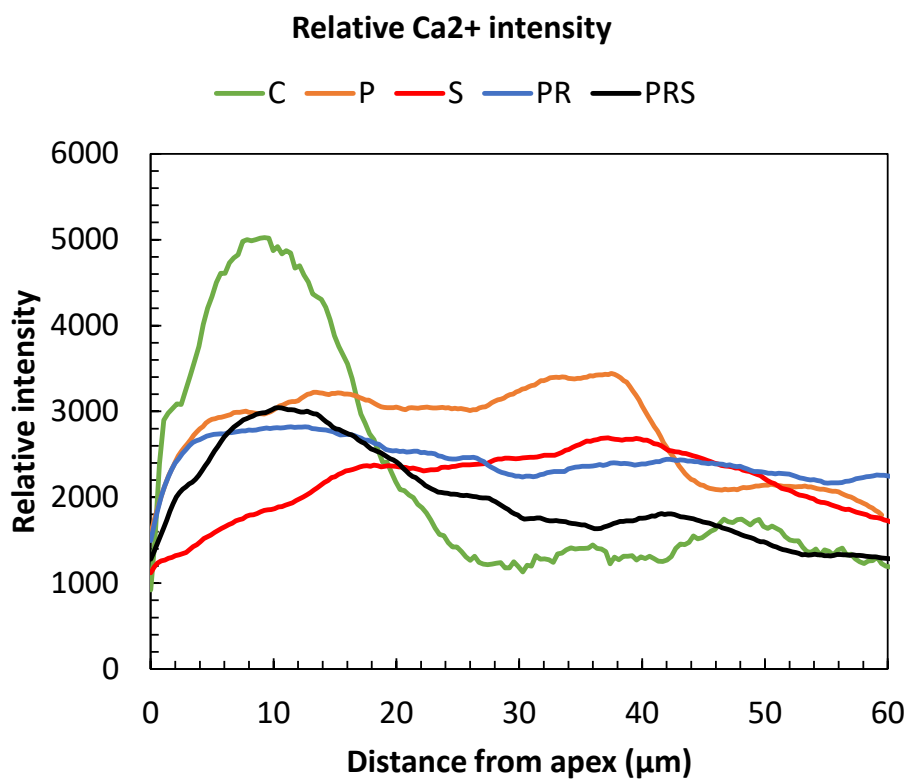

Supplement: s1 [file s1]
